# Supplementary material for: Temporal analysis of natural variation for the rate of leaf production and its relationship with flowering initiation in Arabidopsis thaliana
Source: PubMed Central journal article supplement — J Exp Bot. 2010 Feb 26;61(6):1611–23. doi: 10.1093/jxb/erq032 (PMC2852658; doi:10.1093/jxb/erq032), 2010-02-26

**Temporal analysis of natural variation for the rate of leaf production and its relationship with flowering initiation in *Arabidopsis thaliana***

Belén Méndez-Vigo<sup>1</sup>, M. Teresa de Andrés<sup>1</sup>, Mercedes Ramiro, José M. Martínez-Zapater and Carlos Alonso-Blanco

**SUPPLEMENTARY MATERIAL**

## Supplementary Figures

**Figure S1.** Rate of vegetative development of Ler, Fei-0 and their reciprocal hybrids under LD photoperiod. A) Leaf number, B) rate of leaf production (RLP) and C) plastochron (PLR), in relation to time after germination. Data are mean  $\pm$  SE of 15 plants per genotype. RLP and PLR values are estimated in one week intervals around the time point. Distance-weighted least squares curves were fitted. In A, leaf number is estimated until the appearance of flower buds, which is indicated with arrows for the two parental lines.

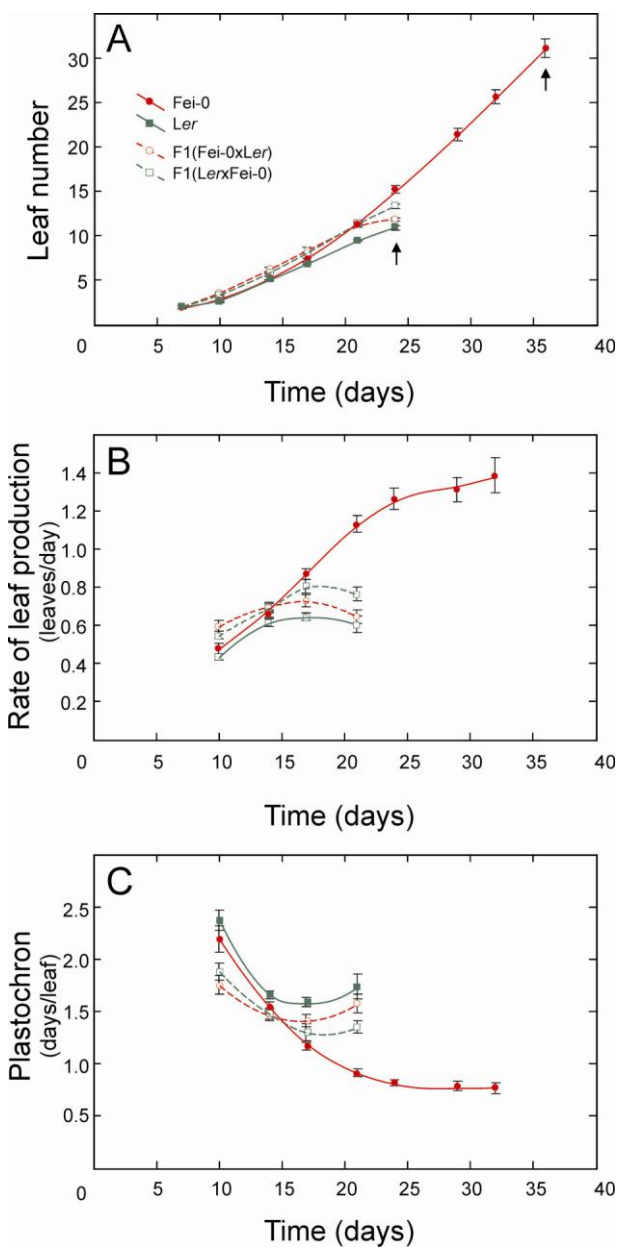

**Figure S2.** Relationship between flowering time and total leaf number in the LerxFei-0 RIL population.

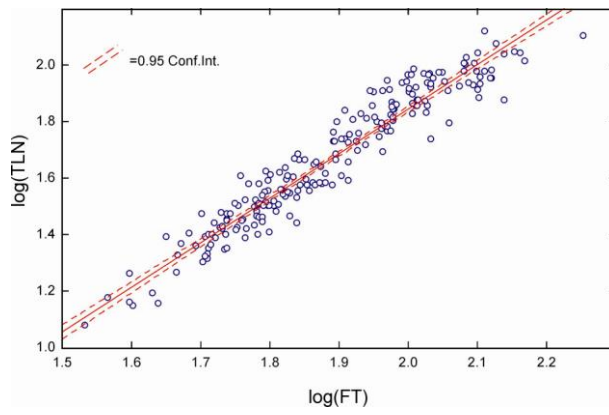

**Figure S3.** Ler/Fei-0 linkage map. A) Comparison of physical and genetic maps along the five linkage groups. B) Segregation distortion in the five linkage groups. Linkage group numbers are shown in the left top corner of each panel. Large circles depict centromeres and the pair of inverted markers is indicated with an arrow (see text for details). Dotted lines correspond to homozygote frequency thresholds ( $P>0.01$ ), while asterisks indicate markers with higher than expected heterozygosity ( $P<0.01$ ).

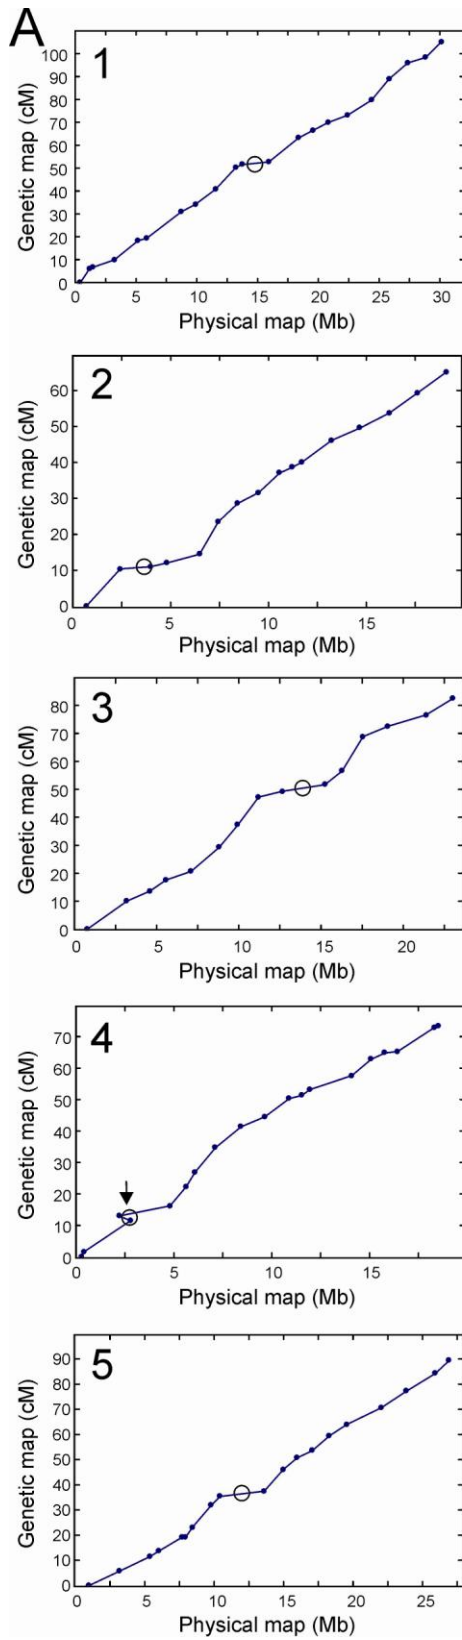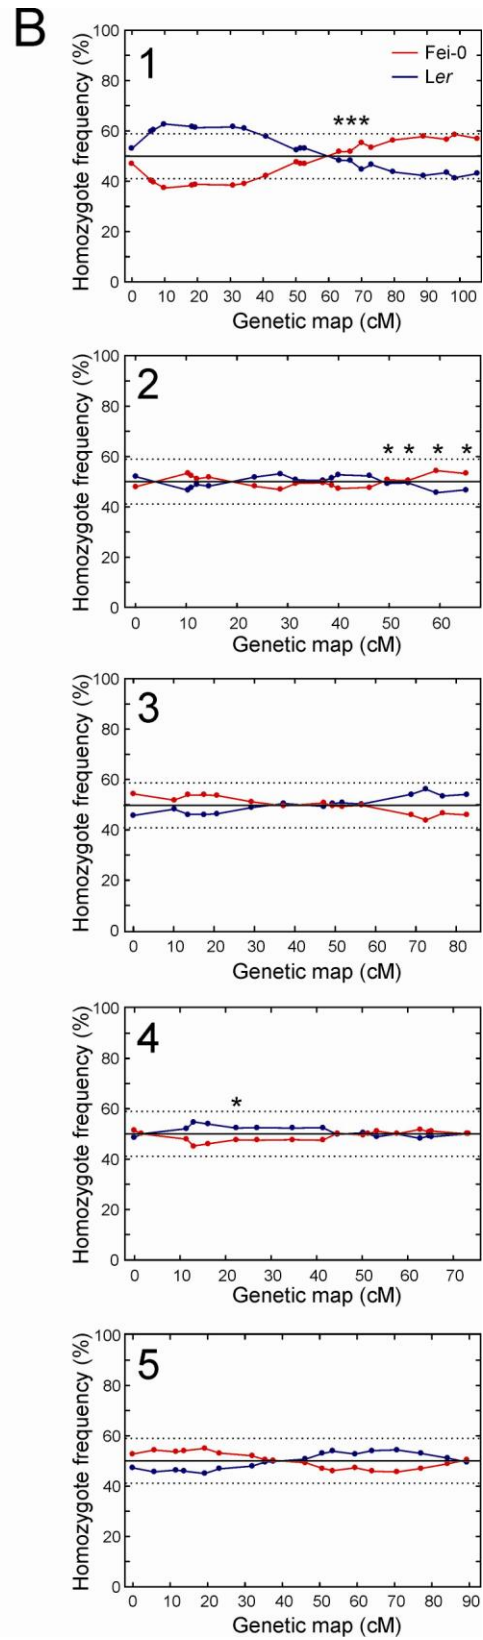

Supplement: erq032_1.pdf [file erq032_1.pdf]
